# Supplementary material for: Tracking the Biostimulatory Effect of Fractions from a Commercial Plant Protein Hydrolysate in Greenhouse-Grown Lettuce
Source: MDPI journal article supplement (doi:10.3390/antiox12010107), 2022-12-31
Supplement: s1 [file s1]

**Table S1:** Shoot fresh weight of lettuce plants as affected by nitrogen dosage and biostimulant application

| Source of variance     | Shoot fresh weight<br>(g plant <sup>-1</sup> ) |
|------------------------|------------------------------------------------|
| Nutrient Solution (NS) |                                                |
| Optimal N (O)          | 286 ± 3                                        |
| Low N (L)              | 63.5 ± 0.7                                     |
| <i>t</i> -test         | ***                                            |
| Biostimulant (B)       |                                                |
| Control                | 166 ± 47 b                                     |
| PH                     | 175 ± 49 ab                                    |
| PH1                    | 177 ± 52 a                                     |
| PH2                    | 175 ± 50 ab                                    |
| PH3                    | 180 ± 51 a                                     |
|                        | **                                             |
| NS × B                 |                                                |
| O×Control              | 272 ± 2 b                                      |
| O×PH                   | 284 ± 4 ab                                     |
| O×PH1                  | 294 ± 2 a                                      |
| O×PH2                  | 286 ± 5 ab                                     |
| O×PH3                  | 294 ± 5 a                                      |
| L×Control              | 60.6 ± 1.4 c                                   |
| L×PH                   | 65.8 ± 0.7 c                                   |
| L×PH1                  | 61.3 ± 0.1 c                                   |
| L×PH2                  | 63.7 ± 0.5 c                                   |
| L×PH3                  | 66.3 ± 0.6 c                                   |
|                        | **                                             |

All data are expressed as mean ± standard error, n = 3. \*\*, \*\*\* significant at  $p \leq 0.01$  and 0.001, respectively. Nitrogen dosage means (O = 8mM NO<sub>3</sub>, L = 1mM NO<sub>3</sub>) were compared by *t*-Test. Different letters within each column indicate significant differences according to Tukey's HSD ( $p = 0.05$ ). PH: Protein Hydrolysate, molecular fractions PH1, PH2 and PH3 (>10 kDa, between 1 and 10 kDa, <10 kDa)

**Table S2:** Colorimetric measurements of lettuce plants as affected by nitrogen dosage and biostimulant application

| Source of variance            | L*         | a*           | b*         | Chroma     | Hue angle |
|-------------------------------|------------|--------------|------------|------------|-----------|
| <b>Nutrient Solution (NS)</b> |            |              |            |            |           |
| Optimal N (O)                 | 43.7 ± 0.4 | -7.05 ± 0.43 | 26.6 ± 0.4 | 27.7 ± 0.4 | 107 ± 2   |
| Low N (L)                     | 42.2 ± 0.4 | -2.32 ± 0.59 | 20.6 ± 0.9 | 21.1 ± 0.9 | 133 ± 10  |
| t-test                        | **         | ***          | ***        | ***        | *         |
| <b>Biostimulant (B)</b>       |            |              |            |            |           |
| Control                       | 42.3 ± 1.2 | -3.62 ± 1.68 | 22.7 ± 2.1 | 23.4 ± 2.3 | 139 ± 18  |
| PH                            | 42.5 ± 0.4 | -4.57 ± 1.44 | 22.1 ± 2.3 | 22.8 ± 2.5 | 118 ± 9   |
| PH1                           | 42.8 ± 0.7 | -5.20 ± 0.93 | 24.9 ± 1.0 | 25.6 ± 1.1 | 119 ± 11  |
| PH2                           | 44.1 ± 0.5 | -5.09 ± 0.97 | 24.7 ± 1.1 | 25.4 ± 1.2 | 107 ± 6   |
| PH3                           | 42.9 ± 0.6 | -4.93 ± 1.52 | 23.9 ± 1.5 | 24.7 ± 1.6 | 118 ± 15  |
|                               | n.s.       | n.s.         | n.s.       | n.s.       | n.s.      |
| NS × B                        |            |              |            |            |           |
| O×Control                     | 44.3 ± 0.7 | -6.21 ± 1.76 | 26.6 ± 1.9 | 27.5 ± 2.0 | 115 ± 9   |
| O×PH                          | 42.2 ± 0.5 | -7.19 ± 0.85 | 25.7 ± 0.7 | 26.8 ± 0.9 | 105 ± 1   |
| O×PH1                         | 44.0 ± 0.6 | -6.94 ± 1.01 | 26.9 ± 0.8 | 27.9 ± 0.8 | 104 ± 2   |
| O×PH2                         | 44.5 ± 0.9 | -7.14 ± 0.66 | 27.0 ± 0.4 | 28.0 ± 0.4 | 105 ± 1   |
| O×PH3                         | 43.5 ± 1.0 | -7.75 ± 0.68 | 27.0 ± 0.6 | 28.2 ± 0.6 | 106 ± 1   |
| L×Control                     | 40.3 ± 1.5 | -1.02 ± 2.05 | 18.7 ± 1.9 | 19.2 ± 1.9 | 162 ± 30  |
| L×PH                          | 42.9 ± 0.5 | -1.96 ± 1.67 | 18.4 ± 3.6 | 18.8 ± 3.7 | 130 ± 16  |
| L×PH1                         | 41.6 ± 0.8 | -3.45 ± 0.49 | 22.8 ± 0.6 | 23.3 ± 0.6 | 133 ± 20  |
| L×PH2                         | 43.7 ± 0.4 | -3.04 ± 0.35 | 22.4 ± 0.5 | 22.8 ± 0.6 | 109 ± 12  |
| L×PH3                         | 42.2 ± 0.3 | -2.12 ± 1.76 | 20.8 ± 0.9 | 21.2 ± 0.9 | 131 ± 32  |
|                               | n.s.       | n.s.         | n.s.       | n.s.       | n.s.      |

All data are expressed as mean ± standard error, n = 3. ns, \*, \*\*, \*\*\* non-significant or significant at  $p \leq 0.05$ , 0.01 and 0.001, respectively. Nitrogen dosage means (O = 8mM NO<sub>3</sub>, L = 1mM NO<sub>3</sub>) were compared by *t*-Test. Chroma =  $((a^*)^2 + (b^*)^2)^{0.5}$ , Hue =  $((\text{Arctan}(b^*/a^*)/2\pi) \times 360) + 180$ . Different letters within each column indicate significant differences according to Tukey's HSD ( $p = 0.05$ ). PH: Protein Hydrolysate, molecular fractions PH1, PH2 and PH3 (>10 kDa, between 1 and 10 kDa, <10 kDa)
